# Supplementary material for: Whole exome sequencing analysis of urine trans-renal tumour DNA in metastatic colorectal cancer patients
Source: PubMed Central journal article supplement — ESMO Open. 2019 Nov 13;4(6):e000572. doi: 10.1136/esmoopen-2019-000572 (PMC7001107; doi:10.1136/esmoopen-2019-000572), 2019-11-13
Supplement: esmoopen-2019-000572supp005.pdf [file esmoopen-2019-000572supp005.pdf]

Table S1

| CASE ID   | Molecular alteration | URINE           |                                     |                            | PLASMA          |                     |
|-----------|----------------------|-----------------|-------------------------------------|----------------------------|-----------------|---------------------|
|           |                      | DOUC (dd/mm/yy) | ddPCR result (% FA)<br>HMW          | ddPCR result (% FA)<br>LMW | DOBD (dd/mm/yy) | ddPCR result (% FA) |
| CRC-UD1   | KRAS p.G13D          | 14/12/2015      | negative                            | negative                   | 14/12/2015      | 5%                  |
| CRC-UD2*  | KRAS p.G12D          | 14/01/2016      | 17%                                 |                            | 14/01/2016      | 9%                  |
| CRC-UD3   | KRAS p.A146T         | 19/01/2016      | negative                            | negative                   | 19/01/2016      | 2.50%               |
| CRC-UD4   | KRAS p.G12V          | 17/02/2016      | negative                            | negative                   | 17/02/2016      | 12%                 |
| CRC-UD5   | KRAS p.G13D          | 19/02/2016      | negative                            | negative                   | 19/02/2016      | 0.4%                |
| CRC-UD6   | KRAS p.G12C          | 24/02/2016      | sample lost during trtDNA isolation |                            | 24/02/2016      | 12%                 |
| CRC-UD7   | BRAF p.V600E         | 07/03/2016      | negative                            | negative                   | 07/03/2016      | 2.95%               |
| CRC-UD8   | BRAF p.V600E         | 15/03/2016      | negative                            | negative                   | 15/03/2016      | 3.40%               |
| CRC-UD9*  | BRAF p.V600E         | 02/05/2016      | 0.80%                               | 5.20%                      | 02/05/2016      | 46.10%              |
| CRC-UD10  | KRAS p.G12V          | 26/01/2016      | negative                            | negative                   | 26/01/2016      | 14.50%              |
| CRC-UD11  | KRAS p.A146T         | 16/03/2016      | negative                            | negative                   | 23/03/2015      | 19.50%              |
| CRC-UD12  | KRAS p.G12D          | 18/03/2016      | negative                            | negative                   | 23/03/2016      | 54.35%              |
| CRC-UD13  | KRAS p.G12V          | 06/04/2016      | negative                            | negative                   | 06/04/2016      | 54.60%              |
| CRC-UD14  | BRAF p.V600E         | 13/05/2016      | negative                            | negative                   | 13/05/2016      | 9.35%               |
| CRC-UD15  | KRAS p.G12V          | 25/02/2016      | negative                            | negative                   | 25/02/2016      | 2.40%               |
| CRC-UD16  | KRAS p.G13D          | 15/12/2015      | negative                            | negative                   | 15/12/2015      | 33.50%              |
| CRC-UD17  | BRAF p.V600E         | 24/03/2016      | negative                            | negative                   | 24/03/2016      | 53.75%              |
| CRC-UD18  | BRAF p.V600E         | 15/07/2015      | negative                            | negative                   | 15/07/2015      | 60%                 |
| CRC-UD19  | BRAF p.V600E         | 16/09/2015      | negative                            | negative                   | 16/09/2015      | 13.50%              |
| CRC-UD20  | BRAF p.V600E         | 15/09/2015      | negative                            | negative                   | 15/09/2015      | 9%                  |
| CRC-UD21* | BRAF p.V600E         | 08/07/2014      | 14.70%                              | 6.60%                      | 08/07/2014      | 5%                  |
| CRC-UD22  | BRAF p.V600E         | 18/02/2014      | 1.70%                               | 3.10%                      | 18/02/2014      | 34%                 |
| CRC-UD23  | KRAS p.A146T         | 12/04/2016      | negative                            | negative                   | 12/04/2016      | 2.25%               |
| CRC-UD24* | KRAS p.G13D          | 25/11/2014      | 2.69%                               | 4.70%                      | 25/11/2014      | 38.30%              |

\* WES cases
