# Supplementary material for: Whole exome sequencing analysis of urine trans-renal tumour DNA in metastatic colorectal cancer patients
Source: PubMed Central journal article supplement — ESMO Open. 2019 Nov 13;4(6):e000572. doi: 10.1136/esmoopen-2019-000572 (PMC7001107; doi:10.1136/esmoopen-2019-000572), 2019-11-13
Supplement: esmoopen-2019-000572supp006.pdf [file esmoopen-2019-000572supp006.pdf]

**Table S2**

|                                                 | <b>CRC-UD02</b> | <b>CRC-UD09</b>                | <b>CRC-UD21</b>                           | <b>CRC-UD24</b>           |
|-------------------------------------------------|-----------------|--------------------------------|-------------------------------------------|---------------------------|
| Tumor location                                  | Rectal          | Rectal                         | Rectal Cancer                             | Sigmoid                   |
| Age at diagnosis                                | 42              | 43                             | 39                                        | 40                        |
| Sex                                             | Male            | Male                           | Male                                      | Female                    |
| Tumor volume                                    | High            | High                           | High                                      | High                      |
| Metastases                                      | lung, nodes     | liver, nodes, local recurrence | T in situ, liver, lung, nodes, peritoneum | liver                     |
| Comorbidities                                   | Hypertension    | No                             | Gastritis HP+ (3y before)                 | No                        |
| Creatinin level (mg/dL)                         | 0.75            | 1.05                           | 0.9                                       | 0.57                      |
| Ongoing therapy at the time of urine collection | none            | crizotinib+vemurafenib         | No (baseline FOLFOX6)                     | No (clinical progression) |
| Molecular status                                | <i>KRAS</i> mut | <i>BRAF</i> mut                | <i>BRAF</i> mut                           | <i>KRAS</i> mut           |

|                 |                         |
|-----------------|-------------------------|
| 0.7 – 1.2 Male  | Creatinin level (mg/dL) |
| 0.5- 1.1 Female | Creatinin level (mg/dL) |
