# Supplementary material for: Whole exome sequencing analysis of urine trans-renal tumour DNA in metastatic colorectal cancer patients
Source: PubMed Central journal article supplement — ESMO Open. 2019 Nov 13;4(6):e000572. doi: 10.1136/esmoopen-2019-000572 (PMC7001107; doi:10.1136/esmoopen-2019-000572), 2019-11-13
Supplement: esmoopen-2019-000572supp007.pdf [file esmoopen-2019-000572supp007.pdf]

**Table S3**

| <b>Sample</b>      | <b>Coverage (%)</b> |
|--------------------|---------------------|
| CRC-UD9_TISSUE     | 98.8055             |
| CRC-UD9_PBMC       | 98.9163             |
| CRC-UD9_PLASMA     | 98.7171             |
| CRC-UD9_URINE      | 98.6024             |
| CRC-UD2_PBMC       | 98.863              |
| CRC-UD2_PLASMA     | 98.3103             |
| CRC-UD2_TISSUE     | 98.2598             |
| CRC-UD2_URINE      | 98.1665             |
| CRC-UD24_TISSUE    | 97.6582             |
| CRC-UD24_PBMC      | 98.8187             |
| CRC-UD24_PLASMA    | 98.2588             |
| CRC-UD24_URINE_HMW | 98.818              |
| CRC-UD24_URINE_LMW | 98.4592             |
| CRC-UD21_TISSUE    | 97.0268             |
| CRC-UD21_PBMC      | 98.8301             |
| CRC-UD21_PLASMA    | 98.4442             |
| CRC-UD21_URINE_HMW | 98.7259             |
| CRC-UD21_URINE_LMW | 98.0737             |
