# Supplementary material for: Whole exome sequencing analysis of urine trans-renal tumour DNA in metastatic colorectal cancer patients
Source: PubMed Central journal article supplement — ESMO Open. 2019 Nov 13;4(6):e000572. doi: 10.1136/esmoopen-2019-000572 (PMC7001107; doi:10.1136/esmoopen-2019-000572), 2019-11-13
Supplement: esmoopen-2019-000572supp008.pdf [file esmoopen-2019-000572supp008.pdf]

Table S4

|                    | CRC-UD9_TISSUE | CRC-UD9_PBMC | CRC-UD9_PLASMA | CRC-UD9_URINE | CRC-UD2_PBMC | CRC-UD2_PLASMA | CRC-UD2_TISSUE | CRC-UD2_URINE | CRC-UD24_TISSUE | CRC-UD24_PBMC | CRC-UD24_PLASMA | CRC-UD24_URINE_HMW | CRC-UD24_URINE_LMW | CRC-UD21_TISSUE | CRC-UD21_PBMC | CRC-UD21_PLASMA | CRC-UD21_URINE_HMW | CRC-UD21_URINE_LMW |
|--------------------|----------------|--------------|----------------|---------------|--------------|----------------|----------------|---------------|-----------------|---------------|-----------------|--------------------|--------------------|-----------------|---------------|-----------------|--------------------|--------------------|
| CRC-UD9_TISSUE     |                | 98.19        | 98.21          | 98.08         | 77.91        | 80.48          | 81.09          | 81.76         | 81.20           | 79.98         | 80.77           | 80.18              | 80.22              | 81.00           | 79.91         | 79.47           | 80.37              | 80.86              |
| CRC-UD9_PBMC       | 98.19          |              | 98.66          | 99.38         | 74.92        | 77.29          | 77.91          | 78.51         | 79.42           | 78.45         | 79.19           | 78.74              | 78.66              | 79.31           | 78.40         | 78.03           | 78.84              | 79.25              |
| CRC-UD9_PLASMA     | 98.21          | 98.66        |                | 98.64         | 77.10        | 79.71          | 80.33          | 80.95         | 80.68           | 79.52         | 80.37           | 79.80              | 79.81              | 80.43           | 79.38         | 78.97           | 79.83              | 80.31              |
| CRC-UD9_URINE      | 98.08          | 99.38        | 98.64          |               | 78.01        | 80.69          | 81.29          | 82.14         | 81.21           | 80.06         | 80.98           | 80.41              | 80.48              | 81.10           | 80.06         | 79.67           | 80.63              | 81.12              |
| CRC-UD2_PBMC       | 77.91          | 74.92        | 77.10          | 78.01         |              | 99.35          | 99.45          | 98.97         | 79.29           | 78.37         | 79.10           | 78.59              | 78.66              | 79.31           | 78.50         | 78.09           | 78.93              | 79.36              |
| CRC-UD2_PLASMA     | 80.48          | 77.29        | 79.71          | 80.69         | 99.35        |                | 99.41          | 98.92         | 80.63           | 79.53         | 80.42           | 79.81              | 79.91              | 80.71           | 79.72         | 79.35           | 80.17              | 80.73              |
| CRC-UD2_TISSUE     | 81.09          | 77.91        | 80.33          | 81.29         | 99.45        | 99.41          |                | 99.08         | 80.69           | 79.50         | 80.48           | 79.83              | 79.87              | 80.74           | 79.77         | 79.40           | 80.28              | 80.83              |
| CRC-UD2_URINE      | 81.76          | 78.51        | 80.95          | 82.14         | 98.97        | 98.92          | 99.08          |               | 81.27           | 80.09         | 81.05           | 80.32              | 80.57              | 81.43           | 80.37         | 79.89           | 80.94              | 81.69              |
| CRC-UD24_TISSUE    | 81.20          | 79.42        | 80.68          | 81.21         | 79.29        | 80.63          | 80.69          | 81.27         |                 | 97.06         | 97.25           | 97.03              | 97.07              | 81.13           | 78.77         | 77.95           | 79.88              | 81.16              |
| CRC-UD24_PBMC      | 79.98          | 78.45        | 79.52          | 80.06         | 78.37        | 79.53          | 79.50          | 80.09         | 97.06           |               | 99.21           | 99.46              | 99.34              | 78.25           | 76.24         | 75.42           | 77.22              | 78.28              |
| CRC-UD24_PLASMA    | 80.77          | 79.19        | 80.37          | 80.98         | 79.10        | 80.42          | 80.48          | 81.05         | 97.25           | 99.21         |                 | 99.22              | 99.21              | 80.07           | 77.89         | 77.10           | 79.03              | 80.19              |
| CRC-UD24_URINE_HMW | 80.18          | 78.74        | 79.80          | 80.41         | 78.59        | 79.81          | 79.83          | 80.32         | 97.03           | 99.46         | 99.22           |                    | 99.33              | 79.98           | 77.90         | 77.14           | 79.04              | 80.15              |
| CRC-UD24_URINE_LMW | 80.22          | 78.66        | 79.81          | 80.48         | 78.66        | 79.91          | 79.87          | 80.57         | 97.07           | 99.34         | 99.21           | 99.33              |                    | 78.95           | 76.82         | 76.05           | 77.96              | 79.09              |
| CRC-UD21_TISSUE    | 81.00          | 79.31        | 80.43          | 81.10         | 79.31        | 80.71          | 80.74          | 81.43         | 81.13           | 78.25         | 80.07           | 79.98              | 78.95              |                 | 96.63         | 96.64           | 96.69              | 96.63              |
| CRC-UD21_PBMC      | 79.91          | 78.40        | 79.38          | 80.06         | 78.50        | 79.72          | 79.77          | 80.37         | 78.77           | 76.24         | 77.89           | 77.90              | 76.82              | 96.63           |               | 99.37           | 99.46              | 99.08              |
| CRC-UD21_PLASMA    | 79.47          | 78.03        | 78.97          | 79.67         | 78.09        | 79.35          | 79.40          | 79.89         | 77.95           | 75.42         | 77.10           | 77.14              | 76.05              | 96.64           | 99.37         |                 | 99.44              | 99.08              |
| CRC-UD21_URINE_HMW | 80.37          | 78.84        | 79.83          | 80.63         | 78.93        | 80.17          | 80.28          | 80.94         | 79.88           | 77.22         | 79.03           | 79.04              | 77.96              | 96.69           | 99.46         | 99.44           |                    | 99.23              |
| CRC-UD21_URINE_LMW | 80.86          | 79.25        | 80.31          | 81.12         | 79.36        | 80.73          | 80.83          | 81.69         | 81.16           | 78.28         | 80.19           | 80.15              | 79.09              | 96.63           | 99.08         | 99.08           | 99.23              |                    |
