# Supplementary figures and images for: Whole exome sequencing analysis of urine trans-renal tumour DNA in metastatic colorectal cancer patients
Source: PubMed Central journal article supplement — ESMO Open. 2019 Nov 13;4(6):e000572. doi: 10.1136/esmoopen-2019-000572 (PMC7001107; doi:10.1136/esmoopen-2019-000572), 2019-11-13

Figure S1

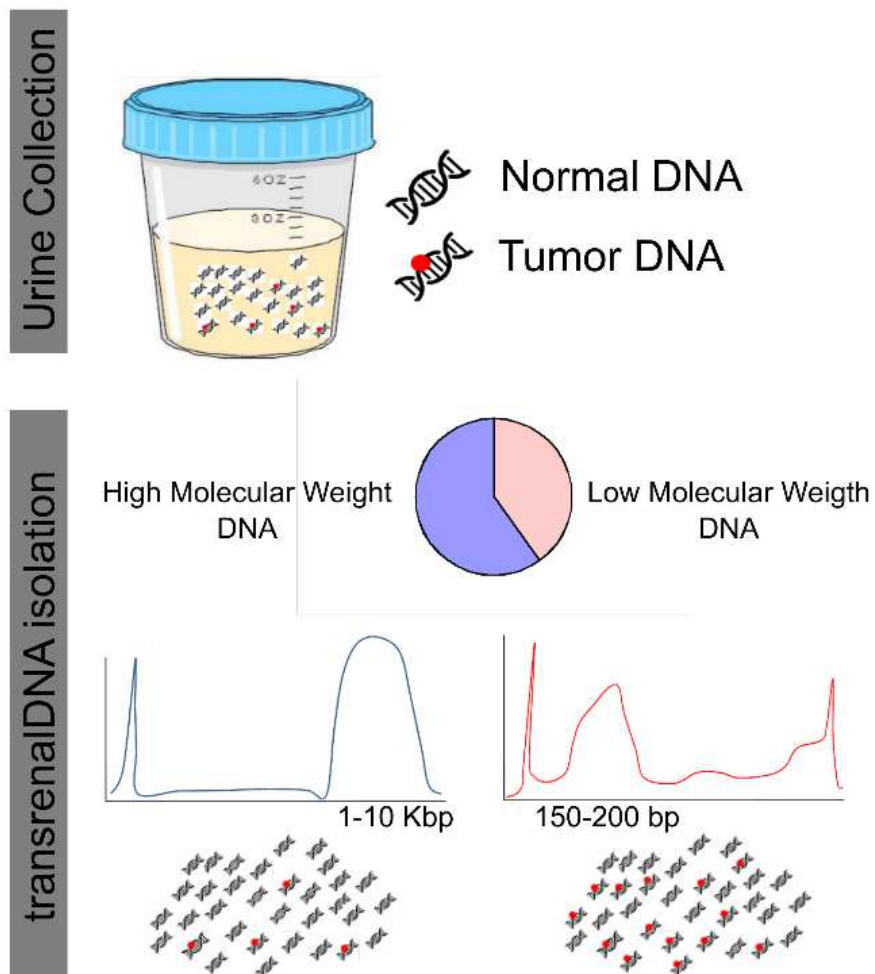

Supplement: esmoopen-2019-000572supp003.pdf [file esmoopen-2019-000572supp003.pdf]

Figure S2

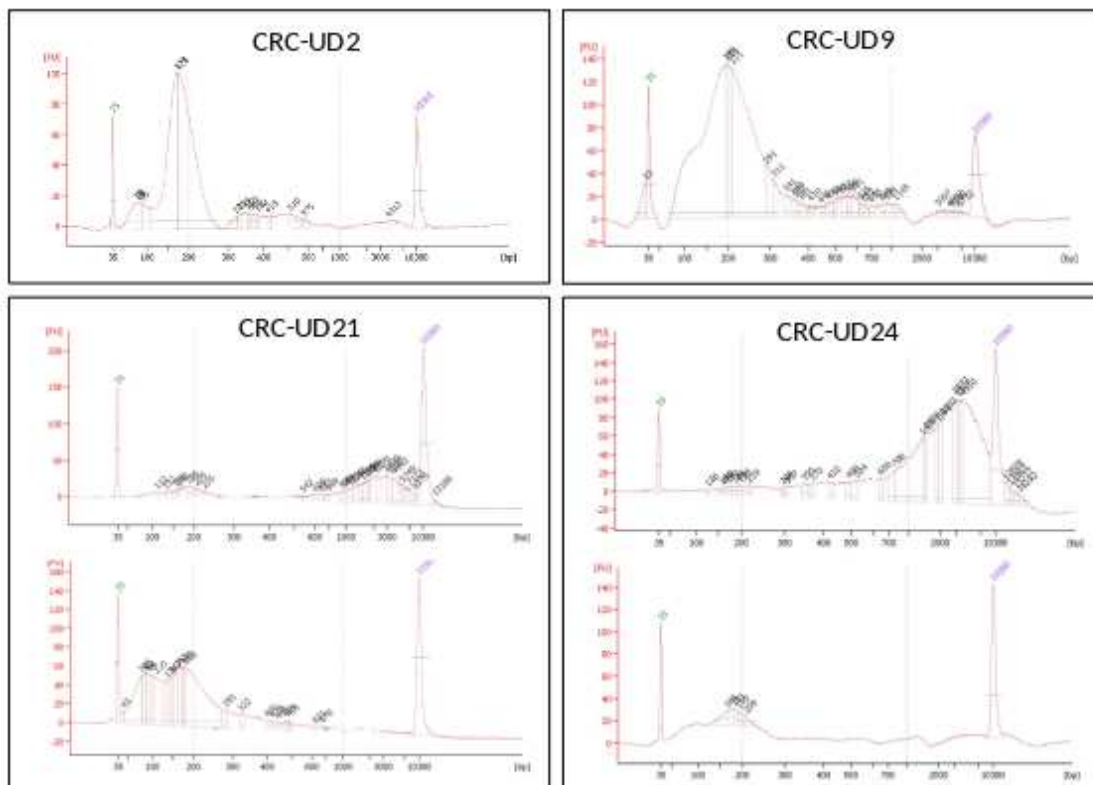

Supplement: esmoopen-2019-000572supp004.pdf [file esmoopen-2019-000572supp004.pdf]

Figure S4

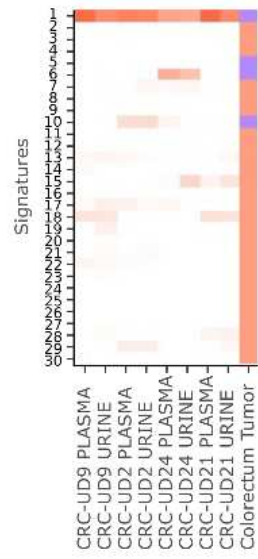

Supplement: esmoopen-2019-000572supp010.pdf [file esmoopen-2019-000572supp010.pdf]

Figure S5

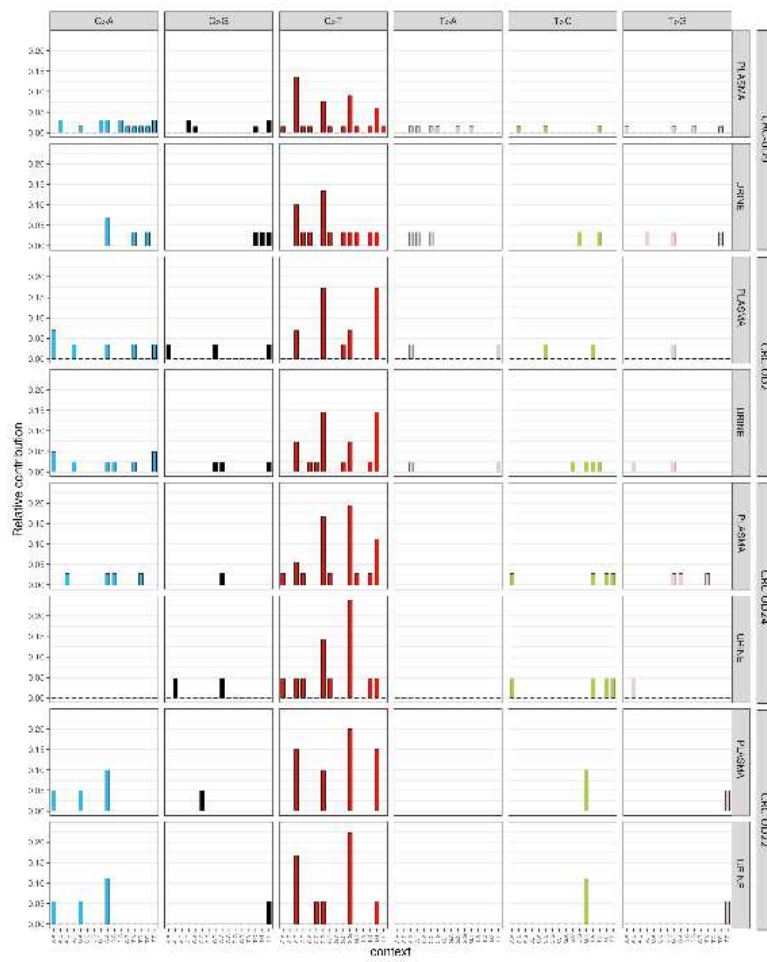

Supplement: esmoopen-2019-000572supp011.pdf [file esmoopen-2019-000572supp011.pdf]
